# Supplementary material
Source: PubMed Central journal article supplement (PMC2820161)
Supplement: NIHMS169552-supplement-Supplement__Data.pdf [file NIHMS169552-supplement-Supplement__Data.pdf]

**Additional Informations for online version only:**

**Table 2.** F and P values from two factors ANOVA statistics

| Experiment                                    | Marker | Structure | Main effect of treatment |          | Main effect of time/genotype |          | Treatment-time/genotype interaction |          |
|-----------------------------------------------|--------|-----------|--------------------------|----------|------------------------------|----------|-------------------------------------|----------|
|                                               |        |           | <i>F</i> (2,47)          | <i>P</i> | <i>F</i> (2,47)              | <i>P</i> | <i>F</i> (4,47)                     | <i>P</i> |
| Pharmacological blockade of A <sub>2A</sub> R | TH     | SNc       | 90.05                    | 4.47E-18 | 1.53                         | n.s.     | 0.79                                | n.s.     |
|                                               | GFAP   | SNc       | 826.99                   | 0        | 0.67                         | n.s.     | 3.76                                | n.s.     |
|                                               |        | Str       | 1665.32                  | 0        | 6.62                         | 0.0025   | 2.17                                | n.s.     |
|                                               | CD11b  | SNc       | 107.49                   | 1.87E-18 | 35.12                        | 4.01E-10 | 33.60                               | 2.27E-13 |
|                                               |        | Str       | 41.01                    | 1.73E-11 | 36.79                        | 9.56E-11 | 15.38                               | 2.06E-08 |
|                                               |        |           | <i>F</i> (1,26)          | <i>P</i> | <i>F</i> (1,26)              | <i>P</i> | <i>F</i> (1,26)                     | <i>P</i> |
| fbnA <sub>2A</sub> R depletion                | TH     | SNc       | 5.17                     | 0.032    | 7.92                         | 0.0092   | 3.35                                | n.s.     |
|                                               | GFAP   | SNc       | 20.05                    | 0.00013  | 23.29                        | 5.32E-05 | 18.83                               | 0.00019  |
|                                               |        | Str       | 248.94                   | 7.85E-15 | 1634.94                      | 5.29E-25 | 192.23                              | 1.6E-13  |
|                                               | CD11b  | SNc       | 14.14                    | 0.0013   | 18.37                        | 0.00040  | 33.00                               | 1.55E-05 |
|                                               |        | Str       | 106.10                   | 1.15E-09 | 111.57                       | 7.37E-10 | 108.56                              | 9.39E-10 |

Table 2 (A.I. for online version): F and P values from two-way ANOVA relative to experiments with A<sub>2A</sub> receptor antagonist (pharmacological blockade of A<sub>2A</sub>R), or in genetically manipulated mice (fbnA<sub>2A</sub>R depletion). n.s.: not significant.

**Generation of *fbnA<sub>2A</sub>KO* mice:** Postnatal forebrain neuron conditional A<sub>2A</sub>KO mice were generated using the Cre/*loxP* system based on the specificity of *CaMKII $\alpha$*  promoter. Near congenic (N6, C57Bl/6) male A<sub>2A</sub><sup>fl $\alpha$ /fl $\alpha$</sup>  mice (i.e., homozygous for the floxed allele of the A<sub>2A</sub>R gene) with or without a *CaMKII $\alpha$ -cre* transgene were used for this study. Tissue-specific postnatal recombination and disruption of the floxed A<sub>2A</sub>R alleles driven by *CaMKII $\alpha$ -cre* expression in forebrain neurons (i.e., *fbnA<sub>2A</sub>KO*) were confirmed by PCR and Western blot as described previously (Bastia et al, 2005, Yu et al, 2008).

**Immunohistochemistry:** For TH, GFAP and CD11b immunostaining, sections were incubated for 1 hr with 5% normal goat serum as blocking agent. The sections were then incubated overnight in primary antibodies (polyclonal rabbit anti-TH, 1:1000, Biomol, United Kingdom; monoclonal mouse anti-GFAP, 1:400, Sigma-Aldrich, Italy; monoclonal rat anti-mouse CD11b, 1:1000, Serotec, United Kingdom). Subsequently the sections were incubated in biotinylated secondary antibodies (goat anti-rabbit IgG for TH, goat anti-mouse IgG for GFAP and goat anti-rat IgG for CD11b, all purchased from Vector, United Kingdom). For visualization, the Avidin-peroxidase protocol (ABC, Vector) was applied, using 3,3'-diaminobenzidine (Sigma-Aldrich, Italy) as the chromogen. Sections were mounted into chrome-alum-gelatin-coated slides dehydrated and coverslipped.

**Stereological counting of TH-immunoreactive and Nissl-stained neurons:** TH-immunoreactive and Nissl-stained neurons were counted on both hemispheres. All stereological counting was performed using a Leica microscope (DMLB; Leica, Denmark) equipped with a camera (Basler Vision Technologies, Germany) and a stage connected to an xyz stepper (PRIOR ProScan) and the newCAST Visiopharm (Denmark) software. The SNc region was outlined at low magnification (5X) for area estimation. The number of labelled neurons was calculated under 63X magnification using randomized meander sampling and optical dissector methods. The cut thickness of sections was 50  $\mu$ m and the

optical dissector height was 12  $\mu\text{m}$ . The top (13  $\mu\text{m}$ ) and bottom (25  $\mu\text{m}$ ) layers that shrunk during staining procedure were discarded. The sampling area covered 100% of the region of interest. The counting frame (8302,8  $\mu\text{m}^2$ ) applied the exclusion and inclusion lines and unbiased counting was performed by an experimenter blinded to the treatment. Results are presented as the mean of TH-immunoreactive and Nissl-stained neurons per  $\text{mm}^3 \pm \text{SEM}$ , calculated using the following formula:

$$\mathbf{D = 3Q / V \text{ sampling}}$$

D = density of labelled cells per  $\text{mm}^3$

V sampling = area of the region of interest x dissector height

Q = total count of labelled neurons.
